# Supplementary material for: Improving the thermostability of a fungal GH11 xylanase via site-directed mutagenesis guided by sequence and structural analysis
Source: PubMed Central journal article supplement (PMC5442702; doi:10.1186/s13068-017-0824-y), 2017-05-23

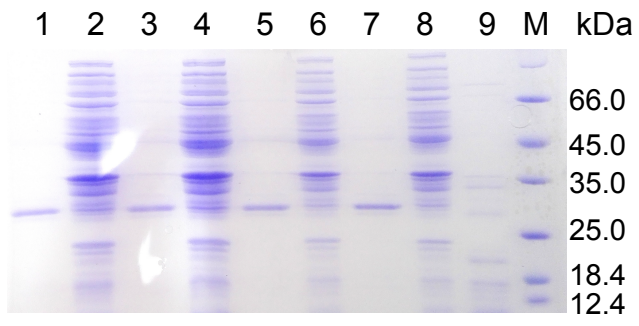

Supplement: 13068_2017_824_MOESM1_ESM.pdf [file 13068_2017_824_MOESM1_ESM.pdf]
